# Supplementary material
Source: Research Square preprint supplement (doi:10.21203/rs.3.rs-10062488/v1)
Supplement: Supplementary file 1 [file 095f65e7d8227bd3455691ea.docx]

**Swift synthesis of Cetyltrimethyl ammonium bromide (CTAB) stabilized rhodium nanochains for surface enhanced Raman scattering (SERS) and catalytic applications**

**Kuppan Sakthikumara,b and Natarajan Kalaivasana,b,***

a Centre for Research, Anna University, Guindy, Chennai-600025.Tamil Nadu, India*.*

b*Department of Chemistry, Thanthai Periyar Government Institute of Technology, Vellore-632002, Tamil Nadu, India.*

* To whom correspondence should be addressed, *E-mail:* [*nkkvasan78@gmail.com*](mailto:nkkvasan78@gmail.com)*,* [*sathikumar4490@gmail.com*](mailto:sathikumar4490@gmail.com)*.* Tel: +91 9443686804.

**Supplementary information:**

**Preparation of samples for various other characterizations.**

The synthesized Rh NPs at CTAB scaffold was characterized using UV-Vis, TEM, XRD, XPS, Laser Raman and FT-IR studies. The as-synthesized Rh NPs at CTAB scaffold was diluted (as required), drop casted over carbon coated copper grids, dried in air and finally analyzed with TEM instrument. For UV-Vis spectroscopic analysis the as-synthesized Rh NPs at CTAB scaffold was used directly. For FT-IR analysis, 10 µL of Rh NPs at CTAB scaffold was mixed with KBr, the reaction mixture was palletized and analyzed immediately with FT-IR instrument. For XRD and XPS analysis, a thin film was prepared by repeatedly pouring 200 µL of Rh NPs at CTAB scaffold separately over glass slide and by drying at room temperature. The process is repeated for more than 15 times. The dried thin film was used for analysis.

**XRD analysis.**

The synthesized Rh NPs at CTAB scaffold have been characterized by X-ray diffraction (XRD) analysis and the comparative XRD pattern were shown in Figure S1. In Fig S1, the broad noisy peaks were observed Rh NPs at CTAB scaffold specifies that the particles are very small in size which is in accordance with the standard pattern of cubic Rhodium (JCPDS: 01-088-2334), and exposed that Rh0 species present in our material. The diffraction from (111), (200), (220), (311) and (222) planes of cubic Rh particles, appeared at 2θ values of 40.7°, 47.4°, 69.3°, 83.6°and 88.3° respectively. In an XRD pattern, the peak at 40.7°(111) was came predominantly in Rh NPs at CTAB scaffold and this type of scenario had already reported.[31,33]

**Figure S-1:** X-ray diffraction (XRD) pattern of Rh NPs at CTAB scaffold.

**Table S-1:** The specific FT-IR band of CTAB reported and the bands observed with corresponding band assignments are given.

| **FT-IR bands – cetyl trimethyl ammonium bromide (CTAB)-Experimental and Reported values** | | |
| --- | --- | --- |
| **-1**  **FT-IR bands (cm )**  **(experimentally observed)** | **-1**  **FT-IR frequency range (cm )**  **(reported value)** | **Absorbing bonds/vibration types** |
| 3339, 3649 | 3330, 3600 | –N-H stretching vibration; -O-H stretching vibration |
| 3015 | 2959, 2870 | -CH - anti-symmetrical and symmetrical  3  stretching |
| 2921, 2849 | 2916, 2828 | -(CH )- anti-symmetrical and  2  symmetrical stretching |
| 1388 | 1376 | -CH - symmetric deformation  3 |
| 1139, 1240, 1299 | 1300-1000 (1041,1151,1265) | -(CH )- out-plane swinging  2 |
| 1046 | 1040 | Symmetric stretching vibration C-N bonds |
| 908, 959, 1472 | 908, 961, 1472 | +  Tertiary Amine [RN(CH ) ]  3 3 |
| 728 | 720, 728 | -(CH )- in-plane swinging  2 |
| Reference: [Huang](http://pubs.rsc.org/en/results?searchtext=Author%3ALimin%20Huang), L.; [Chen](http://pubs.rsc.org/en/results?searchtext=Author%3AXiaoyin%20Chen), X.; [Li](http://pubs.rsc.org/en/results?searchtext=Author%3AQuanzhi%20Li), Q. *J. Mater. Chem.* **2001**, 11, 610. | | |
